# Supplementary material for: Long-term course of untreated asymptomatic esophageal eosinophilia and minimally symptomatic eosinophilic esophagitis
Source: PubMed Central journal article supplement — Endosc Int Open. 2024 Apr 15;12(4):E545–53. doi: 10.1055/a-2280-8277 (PMC11018394; doi:10.1055/a-2280-8277), 2024-04-15

## Supplementary material

**Supplementary Table 1** Total EREFS (IQR) at first diagnosis, 60-71 months, and last follow-up in the Tx and NT groups.

| <b>All</b>            | <b>Tx group (n = 14)</b> | <b>NT group (n = 22)</b> |
|-----------------------|--------------------------|--------------------------|
| First diagnosis       | 3 (2-5)                  | 3 (3-4)                  |
| 60-71 months          | 0 (0-4)                  | 2 (1-3)                  |
| Last follow-up        | 1 (0-2.25)               | 1.5 (0.75-3)             |
| <b>Diffuse type</b>   | <b>Tx group (n = 10)</b> | <b>NT group (n = 7)</b>  |
| First diagnosis       | 4 (2-5)                  | 4 (4-5)                  |
| 60-71 months          | 0 (0-2.5)                | 2 (1-5)                  |
| Last follow-up        | 1 (0-3.25)               | 3 (1-4)                  |
| <b>Localized type</b> | <b>Tx group (n = 4)</b>  | <b>NT group (n = 15)</b> |
| First diagnosis       | 3 (2.25-3)               | 3 (3-3)                  |
| 60-71 months          | 0.5 (0-1.75)             | 1 (1-2)                  |
| Last follow-up        | 1 (0.25-1)               | 1 (0-3)                  |

Tx, PPI/PCAB treatment; NT, no treatment; PPI, proton pump inhibitor; PCAB, potassium competitive acid blocker; EREFS, EoE endoscopic reference score; IQR, interquartile range.

## Supplementary material

**Supplementary Table 2** Number of patients showing endoscopic remission (total EREFS  $\leq 2$ ) and non-remission (total EREFS  $>3$ ) at each follow-up period.

| Treatment group               |                 | Tx group                 |                           | NT group                |                            |
|-------------------------------|-----------------|--------------------------|---------------------------|-------------------------|----------------------------|
|                               |                 | Diffuse type<br>(n = 10) | Localized type<br>(n = 4) | Diffuse type<br>(n = 7) | Localized type<br>(n = 15) |
| Endoscopic phenotype          |                 |                          |                           |                         |                            |
| Timing of follow-up endoscopy | First diagnosis | 3/7 (0)                  | 1/3 (0)                   | 0/7 (0)                 | 3/12 (0)                   |
|                               | 0-11 months     | 5/2 (3)                  | 2/2 (0)                   | 2/2 (3)                 | 7/1 (7)                    |
|                               | 12-23 months    | 2/7 (1)                  | 3/1 (0)                   | 4/3 (0)                 | 10/3 (2)                   |
|                               | 24-35 months    | 6/2 (2)                  | 3/1 (0)                   | 1/4 (2)                 | 6/3 (6)                    |
|                               | 36-47 months    | 3/5 (2)                  | 4/0 (0)                   | 3/4 (0)                 | 9/4 (2)                    |
|                               | 48-59 months    | 3/4 (3)                  | 4/0 (0)                   | 2/4 (1)                 | 10/2 (3)                   |
|                               | 60-71 months    | 6/3 (1)                  | 4/0 (0)                   | 4/3 (0)                 | 12/3 (0)                   |
|                               | 72-83 months    | 5/0 (5)                  | 3/0 (1)                   | 2/2 (3)                 | 6/1 (8)                    |
|                               | 84-95 months    | 4/1 (5)                  | 2/0 (2)                   | 2/4 (1)                 | 6/1 (8)                    |
|                               | 96-107 months   | 4/0 (6)                  | 1/0 (3)                   | 1/1 (5)                 | 5/1 (9)                    |
|                               | 108-119 months  | 1/1 (8)                  | 1/0 (3)                   | 1/0 (6)                 | 1/1 (13)                   |
|                               | 120-131 months  | 1/1 (8)                  | 1/0 (3)                   | 0/0 (7)                 | 2/0 (13)                   |

Tx, PPI/PCAB treatment; NT, no treatment; PPI, proton pump inhibitor; PCAB, potassium competitive acid blocker; EREFS, EoE endoscopic reference score.

The numbers in the table sequentially indicate the number of patients with EREFS  $\leq 2$ / EREFS  $> 3$ . The numbers within parentheses represent the numbers of patients who did not undergo follow-up endoscopy.

## Supplementary material

**Supplementary Fig. 1** IEC assessed by esophageal biopsies at first diagnosis, 60 to 71 months, and last follow-up was separately shown for the PPI/PCAB treatment (Tx) group and the no treatment (NT) group and further for the endoscopic phenotypes. The timing of the last follow-up varies from patient to patient. Tx, PPI/PCAB treatment; NT, no treatment; IEC, intraepithelial eosinophil count.

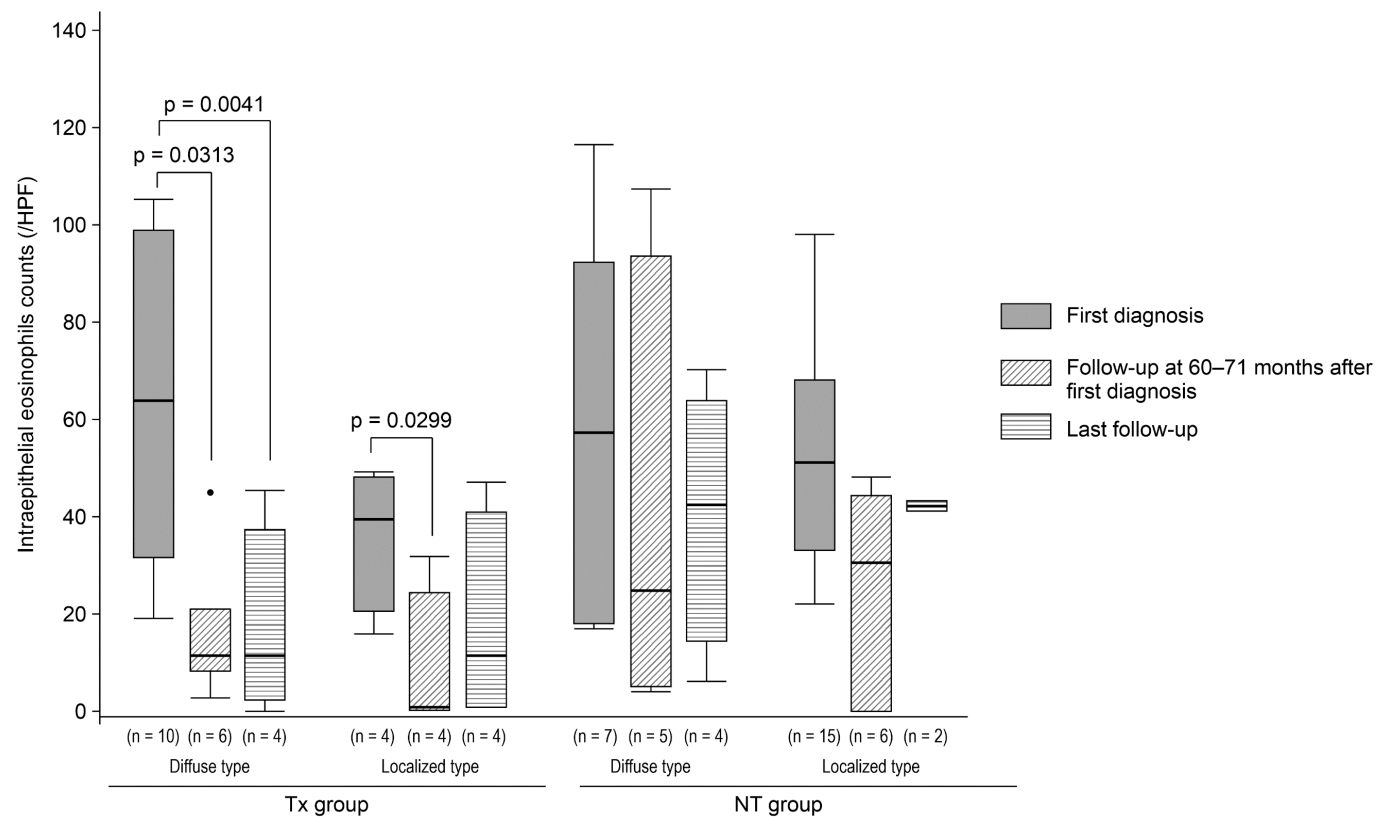

Supplement: 10-1055-a-2280-8277_22843282.pdf.pdf [file 10-1055-a-2280-8277_22843282.pdf.pdf]
